# Supplementary material
Source: publisher figshare collection journal article supplement (https://asha.figshare.com/articles/dataset/_/6170495)
Supplement: Supplementary file 1 [file 1]

**Supplemental Appendix 1.** Intrarater (shown in gray) and interrater reliability across the first author and raters.

|                     | <b>First author</b> | <b>Rater 1</b> | <b>Rater 2</b> | <b>Rater 3</b> | <b>Rater 4</b> | <b>Rater 5</b> | <b>Rater 6</b> | <b>Rater 7</b> | <b>Rater 8</b> | <b>Rater 9</b> |
|---------------------|---------------------|----------------|----------------|----------------|----------------|----------------|----------------|----------------|----------------|----------------|
| <b>First author</b> | 94.6                | 95.3           | 96.1           | 91.3           | 94.2           | 92.7           | 94.3           | 95.2           | 96.2           | 92.1           |
| <b>Rater 1</b>      |                     | 97.6           | 97.2           | 93.3           | 96.8           | 93.4           | 95.9           | 97.9           | 94.3           | 92.9           |
| <b>Rater 2</b>      |                     |                | 99.1           | 86.5           | 93.9           | 89.9           | 94.7           | 98.1           | 95.2           | 89.3           |
| <b>Rater 3</b>      |                     |                |                | 88.3           | 92.4           | 89.9           | 92.7           | 88.6           | 89.7           | 86.4           |
| <b>Rater 4</b>      |                     |                |                |                | 95.6           | 93.5           | 95.4           | 94.3           | 94.9           | 93.6           |
| <b>Rater 5</b>      |                     |                |                |                |                | 93.7           | 94.9           | 93.4           | 93.5           | 94.3           |
| <b>Rater 6</b>      |                     |                |                |                |                |                | 96.8           | 97.2           | 93.9           | 88.2           |
| <b>Rater 7</b>      |                     |                |                |                |                |                |                | 97.5           | 94.6           | 93.9           |
| <b>Rater 8</b>      |                     |                |                |                |                |                |                |                | 95.4           | 93.2           |
| <b>Rater 9</b>      |                     |                |                |                |                |                |                |                |                | 92.8           |
