# Supplementary material
Source: publisher figshare collection journal article supplement (https://asha.figshare.com/articles/dataset/_/6170495)
Supplement: Supplementary file 2 [file 1]

**Supplemental Appendix 2.** Interrater reliability (mean and standard deviation) for each perceptual measure calculated across the first author and nine independent raters.

| <b>Measure</b>                                                           | <b><i>M</i></b> | <b><i>SD</i></b> |
|--------------------------------------------------------------------------|-----------------|------------------|
| <b>Single-Word Test of Polysyllables</b>                                 |                 |                  |
| Percentage of stress matches (lexical stress) on polysyllable test       | 91.2            | 3.2              |
| Syllable segregation                                                     | 86.6            | 4.3              |
| Presence of false articulatory starts, restarts or within-speech groping | 93.4            | 4.2              |
| PPC on the polysyllable test                                             | 93.7            | 2.7              |
| PVC on the polysyllable test                                             | 90.1            | 4.1              |
| PCC-R on the polysyllable test                                           | 94.3            | 3.5              |
| Vowel or consonant distortions                                           | 88.2            | 3.9              |
| Intrusive schwa                                                          | 93.2            | 1.3              |
| Voicing errors                                                           | 95.2            | 1.7              |
| Increased difficulty with polysyllable words (change score)              | 92.3            | 2.4              |
| <b>Connected speech sample</b>                                           |                 |                  |
| Articulation rate (syllables per second) in connected speech             | 87.4            | 3.6              |
| <b>DEAP (Inconsistency subtest)</b>                                      | 96.4            | 1.2              |
| <b>Oral and Motor Speech Protocol</b>                                    |                 |                  |
| /pətəkə/ accuracy                                                        | 96.2            | 3.8              |
| /tə/ rate                                                                | 96.8            | 2.6              |
| /pə/ rate                                                                | 95.2            | 2.8              |
| /kə/ rate                                                                | 96.5            | 3.9              |
| /pətəkə/ rate                                                            | 95.4            | 1.4              |
| /pətikeIk/ rate                                                          | 96.3            | 1.9              |
| Maximum phonation time /a/ (MPT)                                         | 98.2            | 0.8              |
| Oral structure score                                                     | 93.5            | 2.4              |
| Oral function score                                                      | 92.3            | 2.6              |
| Nonspeech groping movements                                              | 90.1            | 4.7              |

*Note.* This excludes standardized CELF scores.
